# Supplementary material
Source: ML conference proceedings conference paper supplement (https://openreview.net/forum?id=p3z75I8lVq)
Supplement: supplementary_material [file supplementary.pdf › bilateraldriving-supplementary-material/supplementary.pdf]

# Unifying Appearance Codes and Bilateral Grids for Driving Scene Gaussian Splatting

– Supplementary Material –

This supplementary document provides additional insights and technical details regarding our proposed multi-scale bilateral grid framework. We begin with an expanded discussion of implementation specifics, covering our guidance map generation, slice operation, multi-scale fusion strategy, comprehensive training details (including loss functions and optimization), and dynamic rendering techniques for real-world ISP adaptation in Section A1. To assess performance, we describe our evaluation protocol, detailing the diverse autonomous driving datasets utilized (Waymo, NuScenes, PandaSet, and Argoverse2) and the key metrics for geometry and appearance evaluation in Section A2. Next, we provide a comprehensive presentation of the detailed quantitative experimental results on these datasets, including per-scene and average metrics for both geometry and appearance, in Section A3. Finally, we showcase additional qualitative visualization results, including error maps and comparisons with baseline methods, to further illustrate the performance of our method across various challenging scenarios in Section A4.

| Scene   | Geometry Evaluation |       |        |
|---------|---------------------|-------|--------|
|         | CD↓                 | RMSE↓ | Depth↓ |
| 152     | 1.227               | 3.463 | 0.042  |
| 164     | 0.889               | 2.469 | 0.103  |
| 171     | 1.042               | 2.813 | 0.075  |
| 200     | 1.300               | 3.617 | 0.020  |
| 209     | 1.294               | 3.524 | 0.065  |
| 359     | 1.238               | 3.542 | 0.036  |
| 529     | 0.678               | 2.675 | 0.021  |
| 916     | 1.623               | 4.617 | 0.109  |
| Average | 1.161               | 3.340 | 0.059  |

Table A1: Detailed Scene-by-Scene Geometry Evaluation on the NuScenes [1]. This table presents key geometry metrics—Chamfer Distance (CD), Root Mean Square Error (RMSE), and Depth error—for individual scenes and averaged across the evaluated sequences from the NuScenes dataset.

| Scene   | Geometry Evaluation |       |        |
|---------|---------------------|-------|--------|
|         | CD↓                 | RMSE↓ | Depth↓ |
| 0       | 1.638               | 3.217 | 1.733  |
| 3       | 1.427               | 2.905 | 0.350  |
| 31      | 0.278               | 1.636 | 0.026  |
| 233     | 1.149               | 3.465 | 0.594  |
| 551     | 1.339               | 3.362 | 0.095  |
| 621     | 0.103               | 1.879 | 0.007  |
| Average | 0.989               | 2.744 | 0.467  |

Table A2: Detailed Scene-by-Scene Geometry Evaluation on the Waymo Open Dataset [3]. This table showcases the Chamfer Distance (CD), Root Mean Square Error (RMSE), and Depth error for specific scenes and their average, evaluating the geometric reconstruction accuracy on the Waymo Open Dataset.

## A1 Implementation details

### A1.1 Expanded Details on Guidance Map, Slice Operation, and Multi-Scale Fusion

To provide a more comprehensive understanding of our multi-scale bilateral grid framework, we elaborate on the key components of guidance map generation, the slice operation, and the hierarchical fusion strategy.

In the main paper, we introduced the luminance-based guidance map  $I^g(u, v)$  to spatially guide our photometric corrections. Here, we elaborate on its definition and the subsequent "slice" operation.

As defined in the original submission:

$$I^g(u, v) = g(I^r(u, v)) = \text{GrayScale}(I^r(u, v)) \quad , \quad (\text{A1})$$

| Scene   | Geometry Evaluation |       |        |
|---------|---------------------|-------|--------|
|         | CD↓                 | RMSE↓ | Depth↓ |
| 63      | 0.760               | 3.812 | 0.015  |
| 66      | 0.517               | 2.657 | 0.008  |
| 70      | 0.310               | 2.244 | 0.027  |
| 73      | 0.280               | 2.012 | 0.007  |
| 74      | 0.680               | 3.240 | 0.009  |
| 77      | 0.190               | 2.926 | 0.004  |
| 78      | 0.403               | 2.819 | 0.008  |
| 79      | 0.198               | 2.081 | 0.004  |
| 88      | 0.968               | 4.674 | 0.039  |
| 149     | 0.228               | 2.052 | 0.007  |
| Average | 0.453               | 2.852 | 0.013  |

Table A3: Detailed Scene-by-Scene Geometry Evaluation on the PandaSet [7]. This table provides a per-scene breakdown and average of Chamfer Distance (CD), Root Mean Square Error (RMSE), and Depth error, assessing geometric reconstruction performance on challenging nighttime scenarios from PandaSet.

| Scene   | Geometry Evaluation |       |        |
|---------|---------------------|-------|--------|
|         | CD↓                 | RMSE↓ | Depth↓ |
| 0       | 0.522               | 3.001 | 0.023  |
| 1       | 2.071               | 5.845 | 0.085  |
| 2       | 0.461               | 3.226 | 0.011  |
| 3       | 0.348               | 3.677 | 0.014  |
| 4       | 1.198               | 4.485 | 0.059  |
| 5       | 0.694               | 5.069 | 0.040  |
| 6       | 0.967               | 6.193 | 0.075  |
| 8       | 0.743               | 4.436 | 0.045  |
| 9       | 0.257               | 1.952 | 0.005  |
| Average | 0.807               | 4.209 | 0.040  |

Table A4: Detailed Scene-by-Scene Geometry Evaluation on the Argoverse2 Dataset [6]. This table displays Chamfer Distance (CD), Root Mean Square Error (RMSE), and Depth error for individual sequences and their average, evaluating geometric accuracy on the Argoverse2 dataset.

| Scene   | Scene Reconstruction |       |        |       |       |         |       |  | Novel View Synthesis |       |        |       |       |         |       |  |
|---------|----------------------|-------|--------|-------|-------|---------|-------|--|----------------------|-------|--------|-------|-------|---------|-------|--|
|         | Full Image           |       |        | human |       | vehicle |       |  | Full Image           |       |        | human |       | vehicle |       |  |
|         | PSNR↑                | SSIM↑ | LPIPS↓ | PSNR↑ | SSIM↑ | PSNR↑   | SSIM↑ |  | PSNR↑                | SSIM↑ | LPIPS↓ | PSNR↑ | SSIM↑ | PSNR↑   | SSIM↑ |  |
| 152     | 27.39                | 0.839 | 0.204  | 29.33 | 0.873 | 27.76   | 0.862 |  | 23.57                | 0.695 | 0.234  | 25.04 | 0.655 | 22.07   | 0.579 |  |
| 164     | 26.52                | 0.829 | 0.232  | 24.75 | 0.789 | 25.60   | 0.793 |  | 23.16                | 0.711 | 0.262  | 19.86 | 0.464 | 21.74   | 0.595 |  |
| 171     | 26.97                | 0.833 | 0.249  | 24.05 | 0.652 | 26.22   | 0.812 |  | 24.39                | 0.748 | 0.273  | 22.28 | 0.568 | 22.51   | 0.639 |  |
| 200     | 27.80                | 0.835 | 0.193  | N/A   | N/A   | 28.08   | 0.832 |  | 25.28                | 0.745 | 0.211  | N/A   | N/A   | 24.11   | 0.643 |  |
| 209     | 29.07                | 0.866 | 0.185  | 28.20 | 0.802 | 28.84   | 0.836 |  | 26.18                | 0.785 | 0.204  | 25.42 | 0.694 | 25.07   | 0.683 |  |
| 359     | 27.95                | 0.859 | 0.168  | 26.98 | 0.795 | 27.25   | 0.839 |  | 24.43                | 0.723 | 0.190  | 24.06 | 0.629 | 22.72   | 0.647 |  |
| 529     | 29.90                | 0.893 | 0.133  | 24.25 | 0.736 | 27.80   | 0.856 |  | 27.40                | 0.826 | 0.146  | 24.18 | 0.712 | 24.84   | 0.745 |  |
| 916     | 25.88                | 0.819 | 0.181  | 28.16 | 0.792 | 26.95   | 0.839 |  | 22.73                | 0.678 | 0.208  | 25.44 | 0.637 | 22.75   | 0.634 |  |
| Average | 27.69                | 0.847 | 0.193  | 26.53 | 0.777 | 27.31   | 0.834 |  | 24.64                | 0.739 | 0.216  | 23.75 | 0.623 | 23.23   | 0.646 |  |

Table A5: Detailed Appearance Evaluation for Scene Reconstruction and Novel View Synthesis on the NuScenes Dataset [1]. This table presents PSNR, SSIM, and LPIPS metrics for the full image, as well as for 'human' and 'vehicle' classes, for both scene reconstruction and novel view synthesis tasks on various NuScenes sequences.

| Scene   | Scene Reconstruction |       |        |       |       |         |       |  | Novel View Synthesis |       |        |       |       |         |       |  |
|---------|----------------------|-------|--------|-------|-------|---------|-------|--|----------------------|-------|--------|-------|-------|---------|-------|--|
|         | Full Image           |       |        | human |       | vehicle |       |  | Full Image           |       |        | human |       | vehicle |       |  |
|         | PSNR↑                | SSIM↑ | LPIPS↓ | PSNR↑ | SSIM↑ | PSNR↑   | SSIM↑ |  | PSNR↑                | SSIM↑ | LPIPS↓ | PSNR↑ | SSIM↑ | PSNR↑   | SSIM↑ |  |
| 0       | 29.26                | 0.840 | 0.311  | N/A   | N/A   | 23.33   | 0.640 |  | 25.94                | 0.770 | 0.341  | N/A   | N/A   | 22.29   | 0.531 |  |
| 3       | 27.94                | 0.841 | 0.241  | 21.82 | 0.632 | N/A     | N/A   |  | 24.30                | 0.737 | 0.269  | 20.45 | 0.505 | N/A     | N/A   |  |
| 31      | 27.65                | 0.849 | 0.224  | 32.93 | 0.784 | 22.54   | 0.683 |  | 23.98                | 0.723 | 0.250  | 30.48 | 0.657 | 19.05   | 0.421 |  |
| 233     | 33.71                | 0.801 | 0.482  | N/A   | N/A   | 23.55   | 0.686 |  | 32.81                | 0.777 | 0.488  | N/A   | N/A   | 22.37   | 0.645 |  |
| 551     | 24.89                | 0.748 | 0.409  | 20.77 | 0.470 | 21.66   | 0.683 |  | 22.54                | 0.670 | 0.437  | 19.99 | 0.407 | 18.76   | 0.471 |  |
| 621     | 31.91                | 0.939 | 0.067  | 26.68 | 0.846 | 26.40   | 0.845 |  | 29.73                | 0.895 | 0.078  | 24.94 | 0.789 | 24.35   | 0.765 |  |
| Average | 29.23                | 0.836 | 0.289  | 25.55 | 0.683 | 23.50   | 0.707 |  | 26.55                | 0.762 | 0.310  | 23.97 | 0.590 | 21.36   | 0.567 |  |

Table A6: Detailed Appearance Evaluation for Scene Reconstruction and Novel View Synthesis on the Waymo Open Dataset [3]. This table details PSNR, SSIM, and LPIPS metrics for full images and specific object classes ('human', 'vehicle') during scene reconstruction and novel view synthesis on selected Waymo sequences.

| Scene   | Scene Reconstruction |       |        |       |       |         | Novel View Synthesis |       |       |        |       |         |       |       |
|---------|----------------------|-------|--------|-------|-------|---------|----------------------|-------|-------|--------|-------|---------|-------|-------|
|         | Full Image           |       |        | human |       | vehicle | Full Image           |       |       | human  |       | vehicle |       |       |
|         | PSNR↑                | SSIM↑ | LPIPS↓ | PSNR↑ | SSIM↑ | PSNR↑   | SSIM↑                | PSNR↑ | SSIM↑ | LPIPS↓ | PSNR↑ | SSIM↑   | PSNR↑ | SSIM↑ |
| 63      | 29.95                | 0.905 | 0.226  | 29.44 | 0.783 | 22.32   | 0.726                | 27.32 | 0.854 | 0.258  | 26.93 | 0.613   | 18.49 | 0.447 |
| 66      | 31.73                | 0.931 | 0.198  | 29.94 | 0.845 | 20.78   | 0.681                | 28.92 | 0.890 | 0.215  | 26.84 | 0.738   | 19.55 | 0.591 |
| 70      | 31.09                | 0.909 | 0.260  | N/A   | N/A   | 21.35   | 0.740                | 28.35 | 0.862 | 0.287  | N/A   | N/A     | 21.20 | 0.674 |
| 73      | 32.13                | 0.931 | 0.198  | 31.26 | 0.868 | 23.33   | 0.806                | 29.16 | 0.889 | 0.214  | N/A   | N/A     | 21.84 | 0.706 |
| 74      | 29.85                | 0.914 | 0.207  | 30.99 | 0.874 | 24.44   | 0.849                | 27.13 | 0.862 | 0.228  | 27.82 | 0.740   | 22.23 | 0.740 |
| 77      | 32.60                | 0.937 | 0.165  | 32.28 | 0.852 | 25.42   | 0.855                | 29.77 | 0.895 | 0.178  | 29.02 | 0.730   | 22.12 | 0.721 |
| 78      | 31.30                | 0.922 | 0.181  | 33.54 | 0.896 | 25.27   | 0.812                | 28.39 | 0.869 | 0.197  | 30.74 | 0.809   | 22.86 | 0.683 |
| 79      | 31.42                | 0.902 | 0.228  | 31.91 | 0.850 | 26.06   | 0.843                | 28.14 | 0.832 | 0.251  | 28.98 | 0.726   | 23.08 | 0.702 |
| 88      | 25.09                | 0.787 | 0.269  | 22.10 | 0.670 | 21.90   | 0.738                | 21.95 | 0.623 | 0.305  | 20.19 | 0.362   | 18.46 | 0.444 |
| 149     | 32.31                | 0.926 | 0.202  | N/A   | N/A   | 24.04   | 0.791                | 29.73 | 0.891 | 0.215  | N/A   | N/A     | 23.37 | 0.728 |
| Average | 30.75                | 0.906 | 0.213  | 30.18 | 0.830 | 23.49   | 0.784                | 27.89 | 0.847 | 0.235  | 27.22 | 0.674   | 21.32 | 0.644 |

Table A7: Detailed Appearance Evaluation for Scene Reconstruction and Novel View Synthesis on PandaSet [7]. This table outlines PSNR, SSIM, and LPIPS metrics for full image and object-specific ('human', 'vehicle') evaluations in both scene reconstruction and novel view synthesis tasks using PandaSet nighttime sequences.

| Scene   | Scene Reconstruction |       |        |       |       |         | Novel View Synthesis |            |       |        |       |       |         |       |
|---------|----------------------|-------|--------|-------|-------|---------|----------------------|------------|-------|--------|-------|-------|---------|-------|
|         | Full Image           |       |        | human |       | vehicle |                      | Full Image |       |        | human |       | vehicle |       |
|         | PSNR↑                | SSIM↑ | LPIPS↓ | PSNR↑ | SSIM↑ | PSNR↑   | SSIM↑                | PSNR↑      | SSIM↑ | LPIPS↓ | PSNR↑ | SSIM↑ | PSNR↑   | SSIM↑ |
| 0       | 25.72                | 0.871 | 0.181  | 25.54 | 0.822 | 26.58   | 0.825                | 22.83      | 0.765 | 0.199  | 23.73 | 0.734 | 23.31   | 0.682 |
| 1       | 22.18                | 0.769 | 0.302  | 21.76 | 0.681 | 22.87   | 0.798                | 20.20      | 0.655 | 0.323  | 18.22 | 0.472 | 18.48   | 0.478 |
| 2       | 27.36                | 0.888 | 0.166  | 25.33 | 0.785 | 28.93   | 0.884                | 24.83      | 0.803 | 0.183  | 22.32 | 0.620 | 23.63   | 0.669 |
| 3       | 26.55                | 0.893 | 0.123  | 23.24 | 0.811 | 25.58   | 0.875                | 24.69      | 0.826 | 0.141  | 21.99 | 0.756 | 23.10   | 0.769 |
| 4       | 22.65                | 0.804 | 0.272  | 22.73 | 0.720 | 23.76   | 0.812                | 20.55      | 0.685 | 0.290  | 19.95 | 0.518 | 19.58   | 0.493 |
| 5       | 24.19                | 0.848 | 0.207  | 23.69 | 0.760 | 23.75   | 0.790                | 22.07      | 0.738 | 0.226  | 21.12 | 0.598 | 20.32   | 0.580 |
| 6       | 23.56                | 0.795 | 0.275  | 19.80 | 0.588 | 21.05   | 0.757                | 21.86      | 0.703 | 0.292  | 18.15 | 0.446 | 17.76   | 0.498 |
| 8       | 23.47                | 0.850 | 0.183  | 25.63 | 0.787 | 23.66   | 0.851                | 21.25      | 0.756 | 0.199  | 20.57 | 0.531 | 19.58   | 0.628 |
| 9       | 26.48                | 0.925 | 0.091  | 22.44 | 0.700 | 24.42   | 0.853                | 24.91      | 0.875 | 0.100  | 21.04 | 0.614 | 21.96   | 0.732 |
| Average | 24.68                | 0.849 | 0.200  | 23.35 | 0.739 | 24.51   | 0.827                | 22.58      | 0.756 | 0.217  | 20.79 | 0.588 | 20.86   | 0.615 |

Table A8: Detailed Appearance Evaluation for Scene Reconstruction and Novel View Synthesis on the Argoverse2 Dataset [6]. This table shows PSNR, SSIM, and LPIPS for full image and object-focused ('human', 'vehicle') assessments across scene reconstruction and novel view synthesis on the Argoverse2 dataset.

| Scene | Method  | Reconstruction |        |         | Novel View Synthesis |        |         | Geometry |        |         |
|-------|---------|----------------|--------|---------|----------------------|--------|---------|----------|--------|---------|
|       |         | PSNR ↑         | SSIM ↑ | LPIPS ↓ | PSNR ↑               | SSIM ↑ | LPIPS ↓ | CD ↓     | RMSE ↓ | Depth ↓ |
| 152   | ChatSim | 25.37          | 0.811  | 0.251   | 1.592                | 3.637  | 0.085   | 22.72    | 0.694  | 0.276   |
|       | Ours    | 27.09          | 0.825  | 0.231   | 1.309                | 3.540  | 0.040   | 23.80    | 0.703  | 0.256   |
| 164   | ChatSim | 24.08          | 0.788  | 0.299   | 1.198                | 2.615  | 0.186   | 22.07    | 0.708  | 0.321   |
|       | Ours    | 26.16          | 0.802  | 0.273   | 0.972                | 2.523  | 0.101   | 23.79    | 0.718  | 0.293   |
| 171   | ChatSim | 25.00          | 0.801  | 0.310   | 1.420                | 2.981  | 0.105   | 23.31    | 0.736  | 0.326   |
|       | Ours    | 26.95          | 0.813  | 0.289   | 1.114                | 2.895  | 0.057   | 24.77    | 0.744  | 0.307   |
| 200   | ChatSim | 24.85          | 0.799  | 0.230   | 1.690                | 3.740  | 0.035   | 23.47    | 0.732  | 0.246   |
|       | Ours    | 27.54          | 0.816  | 0.220   | 1.289                | 3.619  | 0.017   | 25.43    | 0.745  | 0.235   |
| 209   | ChatSim | 25.77          | 0.818  | 0.268   | 1.841                | 3.805  | 0.118   | 24.30    | 0.763  | 0.281   |
|       | Ours    | 27.93          | 0.833  | 0.243   | 1.445                | 3.691  | 0.061   | 25.93    | 0.776  | 0.255   |
| 359   | ChatSim | 25.76          | 0.823  | 0.220   | 1.498                | 3.701  | 0.073   | 23.46    | 0.714  | 0.238   |
|       | Ours    | 27.17          | 0.834  | 0.208   | 1.317                | 3.647  | 0.036   | 24.31    | 0.719  | 0.227   |
| 529   | ChatSim | 27.19          | 0.864  | 0.191   | 1.071                | 2.853  | 0.077   | 25.70    | 0.812  | 0.201   |
|       | Ours    | 29.60          | 0.878  | 0.159   | 0.692                | 2.749  | 0.018   | 27.35    | 0.822  | 0.169   |
| 916   | ChatSim | 22.81          | 0.742  | 0.249   | 2.145                | 4.745  | 0.173   | 21.19    | 0.641  | 0.271   |
|       | Ours    | 23.95          | 0.759  | 0.232   | 1.750                | 4.635  | 0.102   | 21.96    | 0.655  | 0.253   |

Table A9: Comparative Performance Analysis against ChatSim on the NuScenes Dataset. This table provides a scene-by-scene comparison of our method ('Ours') with the ChatSim baseline across scene reconstruction (PSNR, SSIM, LPIPS), novel view synthesis (PSNR, SSIM, LPIPS), and geometry (CD, RMSE, Depth) metrics.

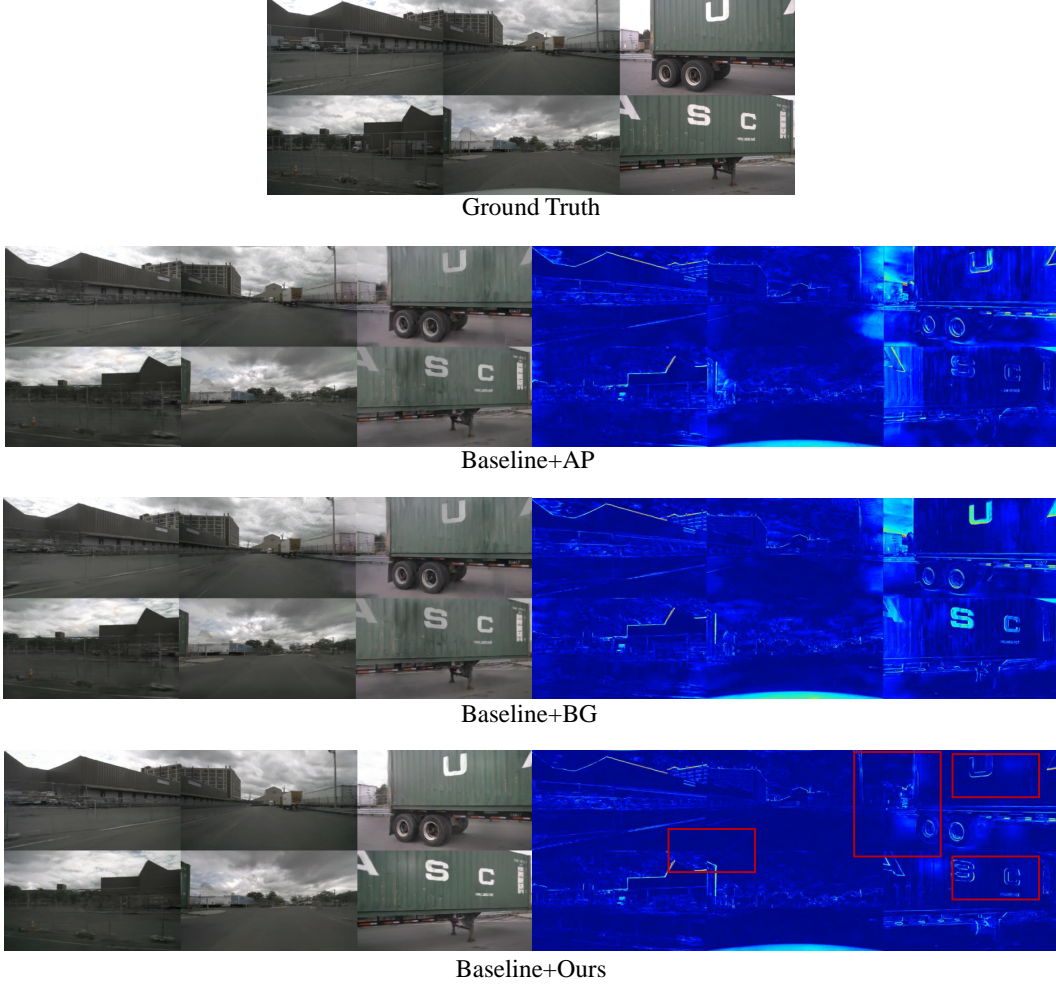

Figure A1: **Qualitative Comparison of Photometric Correction with Baseline Methods.** These figures visualize the output of our method ('Baseline+Ours') against the ground truth, a baseline with appearance codes ('Baseline+AP'), and a baseline with a single bilateral grid ('Baseline+BG'). The accompanying error maps (blue indicating lower error, red higher) and highlighted red boxes demonstrate our method's superior ability to handle complex illumination and reduce artifacts compared to traditional approaches.

the guidance map  $I^g(u, v)$  is derived by applying the  $GrayScale(\cdot)$  function to the rendered image  $I^r(u, v)$ . This function converts RGB color values to a scalar luminance intensity, normalized to the range  $[0, 1]$ . We chose luminance as the guidance signal because it effectively represents spatial brightness variations, capturing shadows, highlights, and illumination gradients – key factors contributing to photometric inconsistencies. This aligns with previous works in image filtering and bilateral processing [2].

The "slice" operation retrieves per-pixel transformations based on this guidance map. For each grid level  $l$  and pixel location  $(u, v)$ , the luminance value  $d = I^g(u, v)$  acts as a query into the grid's intensity dimension  $D^{(l)}$ . As described in main paper:

$$\begin{aligned} \bar{A}^{(l)}(u, v) &= \sum_{i,j,k} w_{i,j,k}(u, v, d) \mathcal{A}^s(i, j, k), \\ w_{i,j,k}(u, v, d) &= \tau(W^{(l)} \cdot u - i) \tau(H^{(l)} \cdot v - j) \tau(D^{(l)} \cdot d - k), \end{aligned} \quad (\text{A2})$$

the level-specific affine transformation  $\bar{A}^{(l)}(u, v)$  is computed through trilinear interpolation. The weights  $w_{i,j,k}(u, v, d)$  are determined by the linear interpolation kernel  $\tau(t) = \max(1 - |t|, 0)$ , ensuring smooth blending of neighboring affine transformation coefficients  $\mathcal{A}^s(i, j, k)$  around the

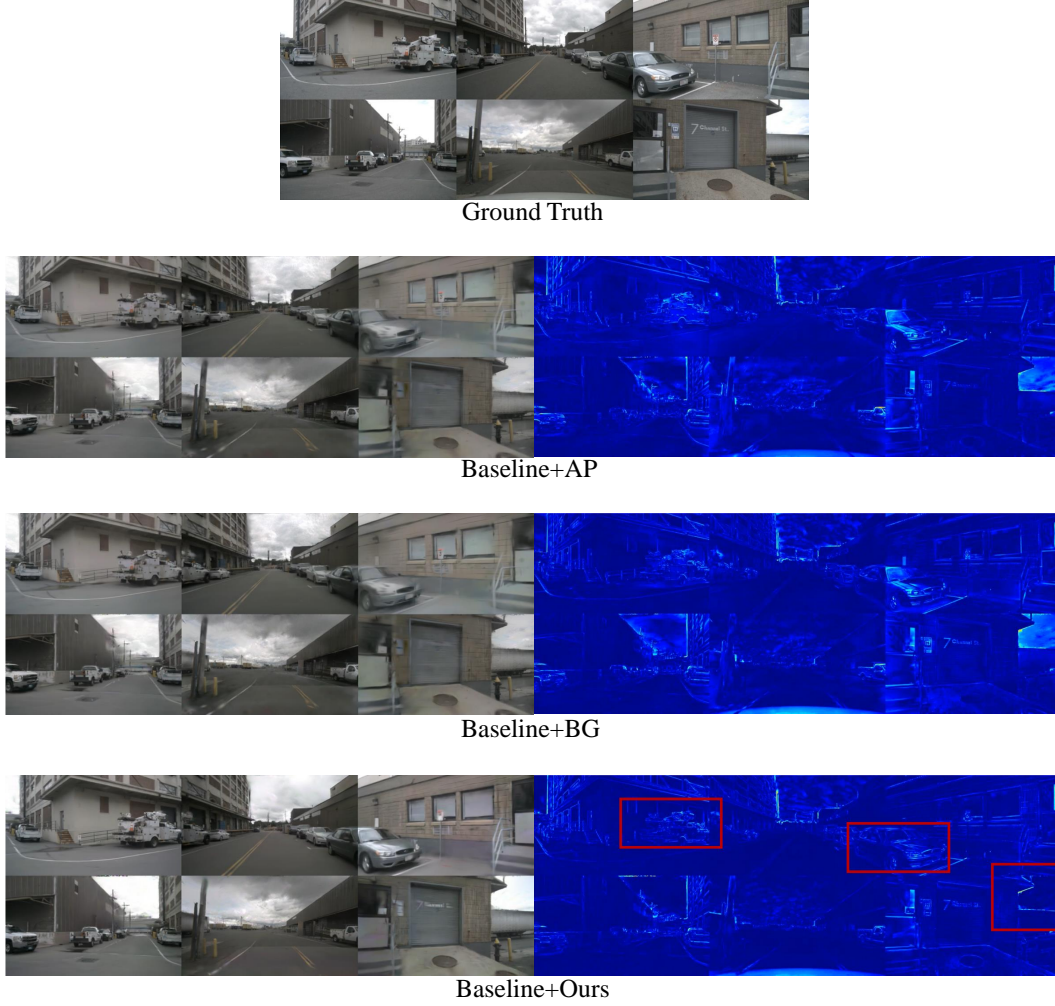

Figure A2: **Qualitative Comparison of Photometric Correction with Baseline Methods.**

| Scene | Method   | Reconstruction  |                 |                    | Novel View Synthesis |                 |                    | Geometry        |                   |                    |
|-------|----------|-----------------|-----------------|--------------------|----------------------|-----------------|--------------------|-----------------|-------------------|--------------------|
|       |          | PSNR $\uparrow$ | SSIM $\uparrow$ | LPIPS $\downarrow$ | PSNR $\uparrow$      | SSIM $\uparrow$ | LPIPS $\downarrow$ | CD $\downarrow$ | RMSE $\downarrow$ | Depth $\downarrow$ |
| 152   | StreetGS | 25.49           | 0.813           | 0.254              | 1.611                | 3.648           | 0.089              | 22.73           | 0.695             | 0.280              |
|       | Ours     | 27.34           | 0.828           | 0.231              | 1.343                | 3.560           | 0.038              | 23.90           | 0.706             | 0.256              |
| 164   | StreetGS | 25.04           | 0.813           | 0.273              | 1.187                | 2.605           | 0.179              | 22.55           | 0.724             | 0.296              |
|       | Ours     | 27.41           | 0.827           | 0.248              | 0.956                | 2.523           | 0.096              | 24.29           | 0.734             | 0.269              |
| 171   | StreetGS | 25.62           | 0.811           | 0.305              | 1.355                | 2.958           | 0.115              | 23.63           | 0.743             | 0.323              |
|       | Ours     | 27.79           | 0.822           | 0.281              | 1.184                | 2.910           | 0.067              | 25.21           | 0.751             | 0.300              |
| 200   | StreetGS | 25.32           | 0.811           | 0.230              | 1.878                | 3.925           | 0.041              | 23.75           | 0.739             | 0.247              |
|       | Ours     | 28.12           | 0.829           | 0.219              | 1.418                | 3.817           | 0.020              | 25.67           | 0.752             | 0.235              |
| 209   | StreetGS | 26.53           | 0.840           | 0.243              | 1.932                | 3.813           | 0.125              | 24.77           | 0.779             | 0.258              |
|       | Ours     | 29.05           | 0.854           | 0.217              | 1.481                | 3.697           | 0.061              | 26.53           | 0.791             | 0.231              |
| 359   | StreetGS | 26.08           | 0.831           | 0.211              | 1.539                | 3.710           | 0.075              | 23.53           | 0.716             | 0.230              |
|       | Ours     | 27.63           | 0.843           | 0.199              | 1.299                | 3.659           | 0.039              | 24.45           | 0.723             | 0.218              |
| 529   | StreetGS | 27.50           | 0.871           | 0.186              | 1.065                | 2.883           | 0.063              | 25.96           | 0.819             | 0.197              |
|       | Ours     | 30.09           | 0.884           | 0.158              | 0.718                | 2.795           | 0.020              | 27.69           | 0.827             | 0.169              |
| 916   | StreetGS | 24.34           | 0.787           | 0.223              | 2.268                | 4.813           | 0.175              | 22.21           | 0.680             | 0.245              |
|       | Ours     | 25.80           | 0.804           | 0.204              | 1.781                | 4.709           | 0.106              | 23.11           | 0.692             | 0.226              |

Table A10: Comparative Performance Analysis against StreetGS on the NuScenes Dataset. This table presents a detailed per-scene comparison of our approach ('Ours') with the StreetGS baseline, evaluating scene reconstruction (PSNR, SSIM, LPIPS), novel view synthesis (PSNR, SSIM, LPIPS), and geometry (CD, RMSE, Depth) metrics.



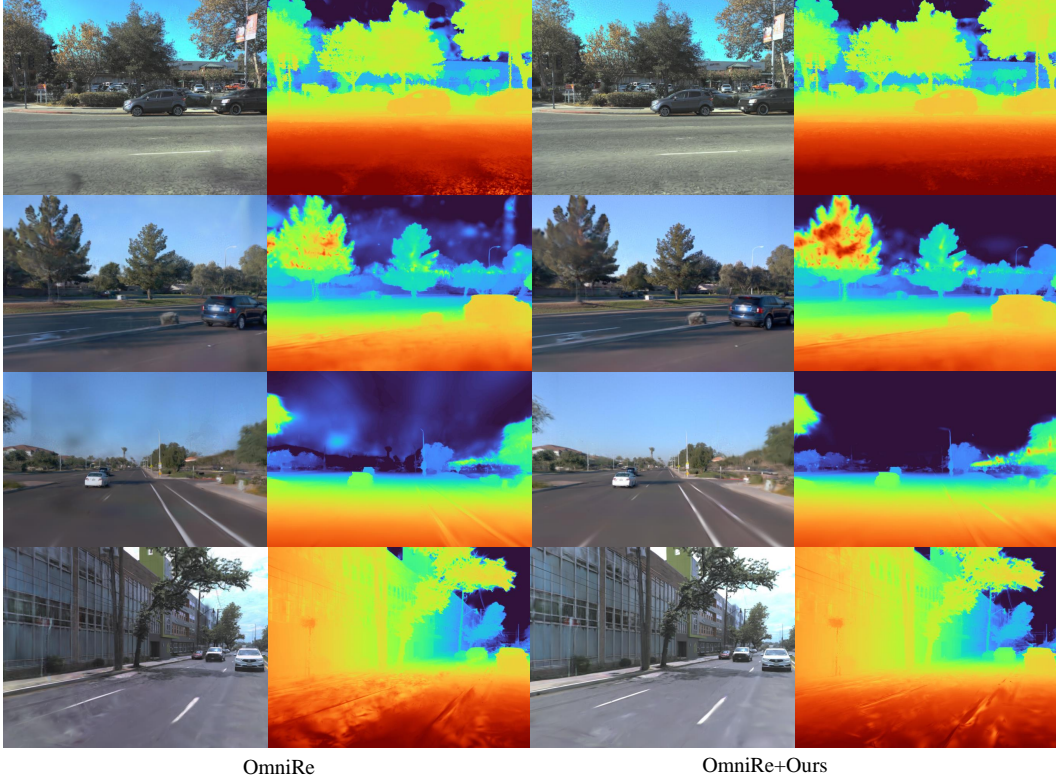

Figure A3: **Qualitative Comparison with the OmniRe.** This figure showcases a side-by-side visual comparison of renderings and depth maps produced by the original OmniRe framework versus OmniRe integrated with our proposed method ('OmniRe+Ours'). The results highlight the enhancements in image fidelity and depth map coherence achieved by our approach.

queried luminance value  $d$ .  $W^{(l)}$ ,  $H^{(l)}$ , and  $D^{(l)}$  represent the dimensions of the bilateral grid at level  $l$ . This formulation explicitly shows how the guidance map drives the spatially-varying photometric correction by modulating the retrieved affine transformations at each pixel. Furthermore, the "slice" operation, which retrieves per-pixel transformations, is a crucial step in our framework. As detailed in Eq. (A2), this operation utilizes trilinear interpolation to smoothly blend affine transformations associated with grid vertices around the queried luminance value. The linear interpolation kernel  $\tau(t) = \max(1 - |t|, 0)$  ensures a continuous and differentiable transformation retrieval process, which is essential for stable optimization during training. The weights  $w_{i,j,k}(u, v, d)$  determine the contribution of each neighboring affine transformation  $\mathcal{A}^s(i, j, k)$ , effectively creating a localized and context-aware photometric adjustment based on the guidance map at each pixel location. This spatially-varying adaptation is key to addressing complex photometric inconsistencies beyond global transformations.

The main paper emphasized the efficiency gained by hierarchical fusion and downsampled guidance maps. Here, we provide further details on the computational advantages of our approach. A naive full-resolution "slice" operation at each scale would be computationally expensive. For a grid of size  $W^{(l)} \times H^{(l)} \times D^{(l)}$  at level  $l$ , and an image of resolution  $W_{\text{img}} \times H_{\text{img}}$ , performing a full-resolution slice would require approximately  $O(W_{\text{img}} \cdot H_{\text{img}})$  trilinear interpolations per level. Summing over  $L$  levels, the total cost becomes  $O(L \cdot W_{\text{img}} \cdot H_{\text{img}})$ .

To mitigate this, we employ downsampled guidance maps  $I^{g(l)}$  of size  $W^{(l)} \times H^{(l)}$ . The "slice" operation is then performed at this reduced resolution. The resulting low-resolution coefficient fields are upsampled to the original image resolution using bilinear interpolation, which is computationally less expensive than trilinear interpolation. The dominant computational cost now shifts to the trilinear interpolation performed at the downsampled resolution, becoming approximately  $O(\sum_{l=0}^{L-1} W^{(l)} \cdot H^{(l)})$ .

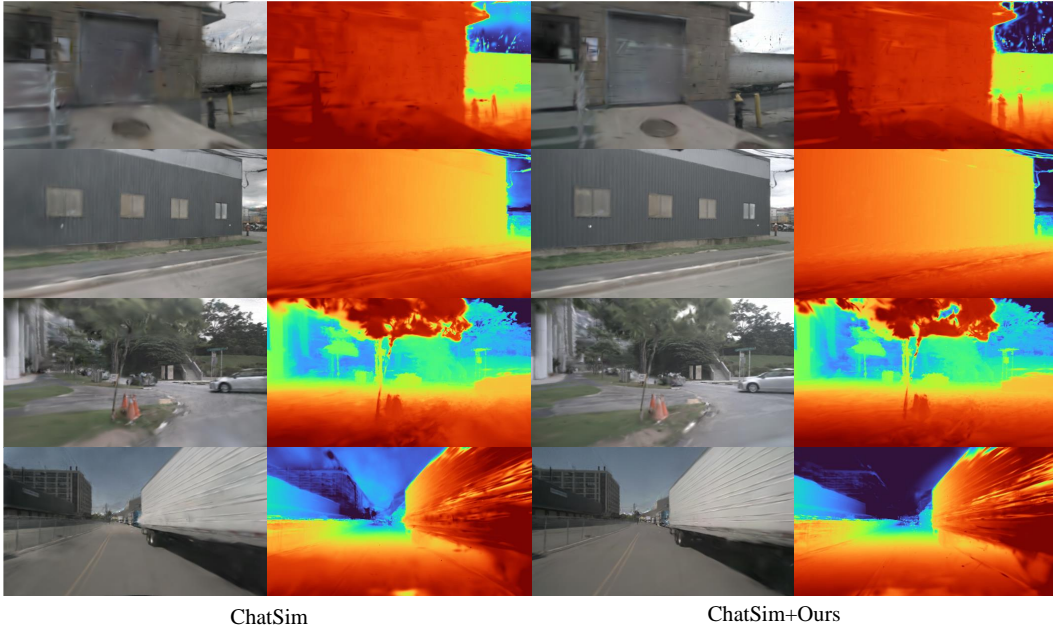

Figure A4: **Qualitative Comparison with the ChatSim.** Visual results comparing the ChatSim framework with ChatSim augmented by our method ('ChatSim+Ours'). The rendered images and corresponding depth maps illustrate the improvements in visual quality and geometric detail provided by our multi-scale bilateral grid framework.

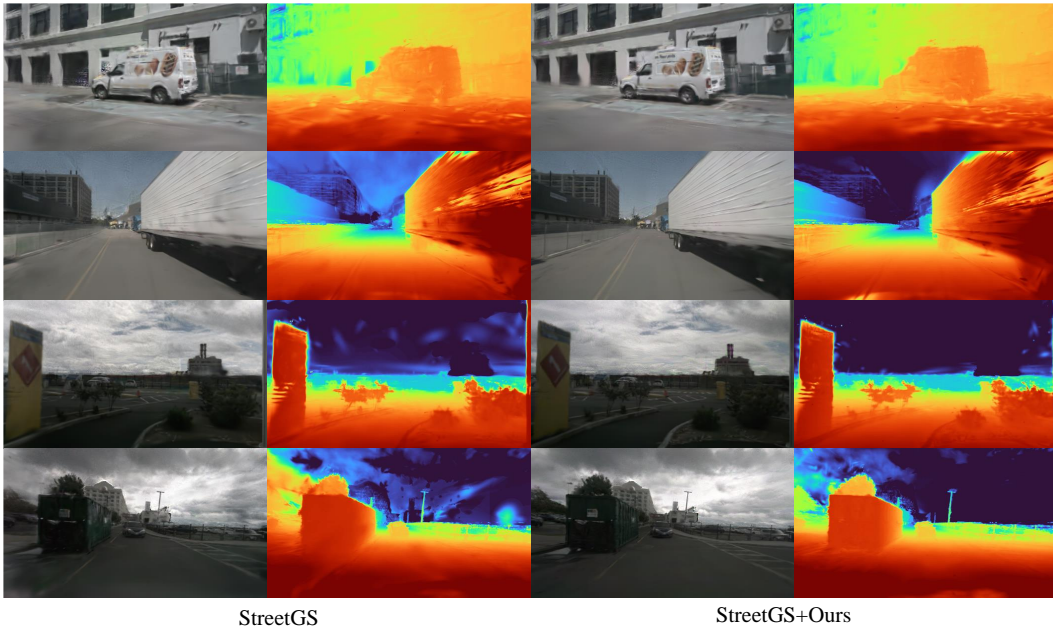

Figure A5: **Qualitative Comparison with the StreetGS.** This figure presents a visual comparison between the StreetGS framework and StreetGS enhanced with our method ('StreetGS+Ours'). The displayed images and depth maps demonstrate the capability of our approach to improve rendering realism and depth accuracy in challenging driving scenarios.

59  $H^{(l)}$ ). By choosing appropriate downsampling factors for each level, we can significantly reduce the  
60 overall computational burden. For example, if we halve the resolution of the guidance map at each  
61 level, the computational cost of slicing is drastically reduced.

62 Furthermore, the hierarchical fusion:

$$I^e = \mathcal{T}^{(L-1)} \circ \mathcal{T}^{(L-2)} \circ \dots \circ \mathcal{T}^{(0)}(I^r), \quad (\text{A3})$$

63 where  $\mathcal{T}^{(l)}(x) = \bar{M}^{(l)} \odot x + \bar{T}^{(l)}$ , allows for efficient combination of transformations. Function  
64 composition is computationally efficient, especially for affine transformations, and the sequential  
65 nature of the fusion allows for a coarse-to-fine refinement process. This hierarchical structure not  
66 only improves efficiency but also facilitates learning scale-specific photometric corrections.

67 Our hierarchical fusion strategy provides an intuitive way to understand the scale-dependent nature  
68 of the learned photometric corrections. At the coarsest scale (e.g.,  $l = 0$ ), the transformation  $\mathcal{T}^{(0)}$   
69 captures a global or near-global affine transformation, similar in spirit to appearance codes. This  
70 can be viewed as learning a transformation  $\bar{A}^{(0)}$  that is approximately constant across the image,  
71 effectively correcting for global photometric biases.

72 Subsequent scales,  $\mathcal{T}^{(1)}, \mathcal{T}^{(2)}, \dots, \mathcal{T}^{(L-1)}$ , then learn residual transformations. For instance,  $\mathcal{T}^{(1)}$   
73 refines the globally corrected image from  $\mathcal{T}^{(0)}$  by applying transformations that capture regional  
74 variations. Mathematically, we can express the refined image after the first two scales as:

$$I^{(2)} = \mathcal{T}^{(1)} \circ \mathcal{T}^{(0)}(I^r) = \mathcal{T}^{(1)}(I^{(1)}) \quad (\text{A4})$$

75 where  $I^{(1)} = \mathcal{T}^{(0)}(I^r)$ . This shows that  $\mathcal{T}^{(1)}$  is learning to correct the already globally corrected  
76 image  $I^{(1)}$ , focusing on regional discrepancies not addressed by the coarse scale. This hierarchical,  
77 residual refinement continues up to the finest scale, allowing for increasingly localized and detailed  
78 photometric adjustments. This scale-dependent approach enables the framework to effectively  
79 decouple global and local photometric variations, leading to improved photometric consistency and  
80 geometric accuracy.

## 81 A1.2 Expanded Details on Training

82 We jointly optimize our multi-scale Gaussian scene representation by minimizing a composite loss  
83 function that combines reconstruction accuracy with regularization terms:

$$\mathcal{L}_{\text{total}} = \mathcal{L}_{\text{recon}} + \lambda_{\text{TV}} \mathcal{L}_{\text{TV}} + \lambda_{\text{circle}} \mathcal{L}_{\text{circle}} \quad (\text{A5})$$

84 where  $\mathcal{L}_{\text{recon}}$  is the primary reconstruction loss, and  $\mathcal{L}_{\text{TV}}$  and  $\mathcal{L}_{\text{circle}}$  are regularization terms, with  $\lambda_{\text{TV}}$   
85 and  $\lambda_{\text{circle}}$  being their respective weighting factors.

### 86 A1.2.1 Reconstruction Loss

87 The core reconstruction loss,  $\mathcal{L}_{\text{recon}}$ , drives the accurate reproduction of both RGB and depth informa-  
88 tion. It is defined as:

$$\mathcal{L}_{\text{recon}} = \lambda_r \mathcal{L}_1 + (1 - \lambda_r) \mathcal{L}_{\text{SSIM}} + \lambda_d \mathcal{L}_d + \lambda_o \mathcal{L}_o \quad (\text{A6})$$

89 Here,  $\mathcal{L}_1$  and  $\mathcal{L}_{\text{SSIM}}$  measure the difference between the rendered and ground truth images using L1  
90 loss and Structural Similarity Index Measure (SSIM), respectively.  $\lambda_r$  balances these two image-space  
91 losses.  $\mathcal{L}_d$  represents the loss between the rendered depth and the ground truth LiDAR depth. Finally,  
92  $\mathcal{L}_o$  is an opacity regularization term that encourages alignment with a non-sky mask, ensuring that  
93 opacity is concentrated on relevant scene geometry.

### 94 A1.2.2 Adaptive Total Variation Regularization Smoothness

95 To encourage smoothness and reduce noise in the optimized grid representations while preserving  
96 important details, we incorporate a Total Variation (TV) regularization term,  $\mathcal{L}_{\text{TV}}$ , at each level of the  
97 multi-scale representation. This term penalizes large gradients in the grid features:

$$\mathcal{L}_{\text{TV}} = \sum_l k^{(l)} \cdot \frac{1}{|\mathcal{A}^{(l)}|} \sum_{i,j,k} \sum_{\mathbb{D} \in \{x,y,z\}} \left\| \Delta_{\mathbb{D}} \mathcal{A}^{(l)}(i,j,k) \right\|_2^2 \quad (\text{A7})$$



98 The adaptive weight  $k^{(l)}$  for each level  $l$  is proportional to the grid size, as defined by:

$$k^{(l)} = a\sqrt{H^{(l)} \cdot W^{(l)} \cdot D^{(l)}} + b \quad (\text{A8})$$

99 where  $H^{(l)}, W^{(l)}, D^{(l)}$  are the dimensions of the grid at level  $l$ , and  $a$  and  $b$  are hyperparameters.  
 100 This adaptive weighting strategy applies lighter regularization to lower-resolution (coarse) grids,  
 101 which capture global structures and edges, thereby preserving essential features. Conversely, higher-  
 102 resolution (fine) grids, which are more susceptible to noise and overfitting high-frequency details,  
 103 receive stronger smoothing for improved stability and generalization.

#### 104 **A1.2.3 Circle Regularization for Photometric Consistency**

105 While our optimization prioritizes geometric reconstruction, this can sometimes lead to discrepancies  
 106 between the rendered image  $I^r$  and the ground truth image  $I^{gt}$ , potentially degrading image quality,  
 107 especially in novel views. To mitigate this and constrain the noise introduced by photometric  
 108 corrections, we introduce a circle regularization loss,  $\mathcal{L}_{\text{circle}}$ :

$$\mathcal{L}_{\text{circle}} = \sum_{(u,v) \in \mathcal{S}} \|I^r(u,v) - \bar{A}^{-1}(I^{gt}(u,v))\|_2^2 \quad (\text{A9})$$

109 where  $\mathcal{S}$  denotes the set of pixel coordinates. This loss encourages the rendered image  $I^r$  to be  
 110 reconstructible from the ground truth image  $I^{gt}$  via an inverse appearance transformation  $\bar{A}^{-1}$ . This  
 111 effectively tightens the permissible space for photometric corrections, preventing overly aggressive  
 112 alterations that could harm perceptual quality.

#### 113 **A1.2.4 Coarse-to-Fine Optimization Strategy**

114 We employ a coarse-to-fine optimization strategy by utilizing level-dependent learning rates ( $1 \times$   
 115  $10^{-5}, 3 \times 10^{-5}, 1 \times 10^{-4}$  from coarse to fine). Specifically, higher learning rates are assigned to  
 116 coarser grids, with progressively lower rates applied to finer grids within the pyramid.

117 This approach is crucial for stable and effective training. The coarse grids, responsible for capturing  
 118 the global appearance and structure, can rapidly learn the overall scene illumination and color  
 119 palette during the initial training stages due to their higher learning rates. Subsequently, the finer  
 120 grids, operating with lower learning rates, focus on refining high-frequency photometric details  
 121 hierarchically. This staged optimization enhances stability by ensuring that global scene consistency  
 122 is established before intricate details are incorporated, ultimately leading to a more robust and accurate  
 123 scene representation.

#### 124 **A1.3 Dynamic Rendering for Real-World ISP Adaptation**

125 Consistent multi-view training is crucial for accurate geometry reconstruction. However, autonomous  
 126 driving applications demand compatibility with dynamic real-world Image Signal Processor (ISP)  
 127 pipelines. These real-world ISPs are inherently heterogeneous, varying across different cameras and  
 128 changing over time due to factors such as evolving lighting conditions and sensor variations. This  
 129 heterogeneity introduces a significant domain gap: synthetic training data, typically rendered with a  
 130 fixed ISP, differs substantially from real-world imagery captured using these dynamic ISPs.

131 To bridge this domain gap and enhance the realism of rendered images under dynamic ISP conditions,  
 132 we employ an interpolation strategy within our multi-scale bilateral grid framework. This approach is  
 133 designed to adapt the rendering process to novel test images that simulate such dynamic ISP effects.

134 Our strategy involves two key practical techniques:

135 (1) **Temporal Proximity Search:** For a novel test image, we first identify the two training timestamps  
 136 from the same camera that are temporally closest to the test image’s timestamp. This leverages the  
 137 inherent temporal coherence of ISP parameters, as ISP settings tend to change smoothly over short  
 138 periods for a given camera.

139 (2) **Scale-Specific Bilateral Grid Interpolation:** We then perform linear interpolation specifically  
 140 on the coarse and medium-scale bilateral grids ( $\mathcal{A}^{(0)}, \mathcal{A}^{(1)}$ ) derived from these two identified training  
 141 timestamps.

The effectiveness of this temporal interpolation stems from the strong correlation between ISP parameters, timestamps, and camera position. Under temporally and spatially proximate conditions, scene illumination and composition generally remain relatively consistent. Consequently, variations in ISP settings within such close temporal and spatial proximity can often be approximated by localized linear photometric transformations. The interpolated grids thus enable the output to adapt to dynamic ISP characteristics, effectively reducing the domain gap.

Let  $t_{\text{novel}}$  be the timestamp of a novel test image. We identify the two temporally nearest training timestamps from the same camera, denoted as  $t_1$  and  $t_2$ , such that  $t_1 \leq t_{\text{novel}} \leq t_2$ . Let  $\mathcal{A}_t^{(l)}$  represent the bilateral grid tensor at level  $l \in \{0, 1, 2\}$  learned during training for a timestamp  $t$ . The interpolation for the coarse and medium levels ( $l \in \{0, 1\}$ ) is formulated as:

$$\hat{\mathcal{A}}^{(l)} = \omega \mathcal{A}_{t_1}^{(l)} + (1 - \omega) \mathcal{A}_{t_2}^{(l)} \quad (\text{A10})$$

where  $\hat{\mathcal{A}}^{(l)}$  is the interpolated bilateral grid tensor at level  $l$  for the novel timestamp  $t_{\text{novel}}$ . The temporal interpolation weight,  $\omega$ , is determined by the proximity of  $t_{\text{novel}}$  to  $t_1$  and  $t_2$ :

$$\omega = \frac{t_2 - t_{\text{novel}}}{t_2 - t_1} \quad (\text{A11})$$

This weighting ensures that  $\hat{\mathcal{A}}^{(l)}$  is influenced more by the grid of the closer timestamp. For instance, if  $t_{\text{novel}} = t_1$ , then  $\omega = 1$ , resulting in  $\hat{\mathcal{A}}^{(l)} = \mathcal{A}_{t_1}^{(l)}$ . Conversely, if  $t_{\text{novel}} = t_2$ , then  $\omega = 0$ , and  $\hat{\mathcal{A}}^{(l)} = \mathcal{A}_{t_2}^{(l)}$ .

The fine-scale grid ( $l = 2$ ) is not used during interpolation. The rationale is that the fine-scale grid is primarily intended to capture scene-intrinsic details rather than global ISP variations, making interpolation at this level unnecessary and potentially counterproductive. By utilizing these interpolated grids  $\hat{\mathcal{A}}^{(0)}, \hat{\mathcal{A}}^{(1)}$ , we proceed with the multi-scale bilateral grid framework as detailed in the main paper. This allows us to render the image for the novel timestamp  $t_{\text{novel}}$  while effectively adapting our rendering pipeline to the challenges posed by dynamic ISP conditions.

#### A1.4 Detailed Analysis of Appearance Codes and Bilateral Grids

This section concisely analyzes the limitations of appearance codes and traditional bilateral grids for photometric correction in dynamic autonomous driving scenarios, motivating our multi-scale approach.

Appearance codes use a global affine transformation for photometric correction:

$$I^e = A_{3 \times 4} \times I^r. \quad (\text{A12})$$

Designed for scene-wide adjustments of brightness/contrast, global methods assume uniform correction is sufficient. However, this fails in complex real-world driving environments with localized photometric variations from specularities, complex illumination, and dynamic lighting. Global transformations inherently cannot address these nuances, leading to spatially inconsistent corrections and hindering detailed 3D reconstruction. Appearance codes are thus a limited "one-size-fits-all" solution inadequate for diverse real-world photometric distortions.

Bilateral grids offer pixel-wise correction:

$$I^e(u, v) = A(u, v) \odot I^r(u, v). \quad (\text{A13})$$

While promising finer local adjustments, high-resolution bilateral grids for dynamic scenes face computational and practical challenges, limiting their effectiveness.

#### Computational Bottlenecks of High-Resolution Bilateral Grids.

a) **Dimensionality Explosion.** For  $N$  cameras and  $T$  time-steps, a single high-resolution grid scales as  $O(N \times T \times H \times W)$ . This massive parameter space drastically increases memory and computational demands, rendering per-pixel transformations across multi-view video impractical on standard hardware.

182       b) **Optimization Complexity.** Optimizing a single monolithic grid for dynamic scenes is  
183       highly complex. Capturing both global scene structure and local dynamic variations requires  
184       iterative algorithms to reconcile conflicting constraints (photometric consistency vs. motion  
185       smoothness), leading to slow convergence, local minima, and unstable optimization.

186 **Practical Deployment Impasse.** Scene complexity variations in driving scenarios exacerbate  
187 practical issues with single bilateral grids. Achieving a balance between reconstruction fidelity and  
188 generalization with a single grid is highly scene-dependent, requiring manual tuning and leading to  
189 key practical roadblocks:

190       a) **Overfitting vs. Undersmoothing Conundrum.** High-resolution grids overfit to noise. Low-  
191       resolution grids undersmooth fine photometric details. Finding a "Goldilocks" resolution for  
192       diverse scenes is extremely difficult and requires heuristic adjustments.

193       b) **Smoothness Regularization Dilemma.** Excessive regularization in single grids over-  
194       smooths valid discontinuities (shadow boundaries). Insufficient regularization leads to  
195       instability and artifacts like floaters. Balancing regularization for stability and detail preser-  
196       vation is a significant challenge.

197 Parameter sensitivity and these trade-offs make direct application of single bilateral grids impractical  
198 for scalable real-world deployments, especially in autonomous driving. Computational intractability  
199 and tuning difficulty highlight their sub-optimal nature for complex photometric inconsistencies,  
200 motivating our multi-scale bilateral grid framework.

## 201 **A2 Datasets**

202 In the main paper, we presented results on four widely-used autonomous driving datasets: Waymo,  
203 NuScenes, Argoverse, and PandaSet to rigorously evaluate the robustness and generalization capabili-  
204 ties of our proposed multi-scale bilateral grid framework. A core objective of our experiments was to  
205 demonstrate that our method is not only effective under ideal conditions but also performs reliably  
206 across a diverse range of real-world autonomous driving scenarios. By testing on datasets with varying  
207 characteristics, we aim to provide strong evidence for the practical applicability and generalizability  
208 of our approach. This section provides dataset-specific details regarding our evaluation protocol.

### 209 **A2.1 Waymo Open Dataset**

210 For the Waymo Open Dataset [3], we employ all five cameras and all the Li-  
211 DAR sensors provided within the dataset. We utilize the entirety of the training  
212 and validation sets without specific sequence selection, leveraging all available cam-  
213 era views and LiDAR data. We conduct our experiments on the following 6 se-  
214 quences: segment-10017090168044687777, segment-10061305430875486848,  
215 segment-10584247114982259878, segment-15090871771939393635,  
216 segment-4458730539804900192, segment-5835049423600303130. which are selected  
217 according to open-source framework [4, 5].

### 218 **A2.2 NuScenes**

219 When evaluating on NuScenes [1], we utilize all six available cameras and all the LiDAR sensors. We  
220 select the following 8 sequences for our experiments: 152, 164, 171, 200, 209, 359, 529,  
221 916, which is an extension of the dataset used by [4]. Similar to other datasets, we address ego-vehicle  
222 visibility by cropping the bottom 80 pixels from the back camera images.

### 223 **A2.3 PandaSet**

224 For PandaSet [7], we utilize the full sensor rig, consisting of six cameras and one LiDAR unit.  
225 We specifically evaluate on the following 10 sequences: 063, 066, 070, 073, 074, 077, 078,  
226 079, 088, 149, which are all challenging and complex nighttime scenarios. To mitigate ego-vehicle  
227 artifacts, we apply a consistent crop to the back camera images, removing the bottom 260 pixels  
228 which often contain views of the vehicle itself.

## A2.4 Argoverse2

For evaluation on Argoverse2 [6], we leverage the seven ring cameras and both LiDAR sensors available in the dataset. In line with [4], we conduct our experiments on the following 9 sequences: 05fa5048-f355-3274-b565-c0ddc547b315, 0b86f508-5df9-4a46-bc59-5b9536dbde9f, 185d3943-dd15-397a-8b2e-69cd86628fb7, 25e5c600-36fe-3245-9cc0-40ef91620c22, 27be7d34-ecb4-377b-8477-ccfd7cf4d0bc, 280269f9-6111-311d-b351-ce9f63f88c81, 2f2321d2-7912-3567-a789-25e46a145bda, 44adf4c4-6064-362f-94d3-323ed42cfda9, 5589de60-1727-3e3f-9423-33437fc5da4b. To minimize ego-vehicle interference, we apply a bottom crop of 250 pixels to the front center, rear left, and rear right camera views, effectively removing regions that may contain the vehicle’s hood or trunk.

## A3 Detail Experiments Results

This section presents a comprehensive breakdown of our model’s performance across various standard autonomous driving datasets. We provide detailed metrics for geometry and appearance evaluation, including scene reconstruction and novel view synthesis.

**Geometry Evaluation.** The geometric accuracy of our method was rigorously evaluated on multiple datasets. The tables below (Tab. A1, Tab. A2, Tab. A3, Tab. A4) show per-scene and average results for Chamfer Distance (CD), Root Mean Square Error (RMSE), and Depth metrics.

**Appearance Evaluation.** We evaluated the appearance quality for both scene reconstruction and novel view synthesis. The metrics used include Peak Signal-to-Noise Ratio (PSNR), Structural Similarity Index Measure (SSIM), and Learned Perceptual Image Patch Similarity (LPIPS). Results are often broken down for the full image, as well as for specific classes like "human" and "vehicle". Tab. A5, Tab. A6, Tab. A7, and Tab. A8 show the detail results.

**Comparisons with State-of-the-Art.** Tab. A9 and Tab. A10 provide comparisons with SOTA methods like ChatSim and StreetGS on the NuScenes dataset for scene reconstruction and novel view synthesis across reconstruction, novel view synthesis, and geometry metrics. These tables show per-scene breakdowns, comparing our method ("Ours") against baselines, demonstrating the efficacy of our approach.

## A4 Additional Visualization Results

To further illustrate the qualitative performance of our method, we provide additional visualization results. These figures showcase comparisons against baselines and ground truth data across various challenging scenarios. Fig. A1 and Fig. A2 present visualization results comparing our method ("Baseline+Ours") with "Baseline+AP" (Appearance Codes) and "Baseline+BG" (Bilateral Grids) against the Ground Truth. The error maps (shown in blue/red) highlight areas where our method achieves lower reconstruction error, particularly in regions with complex lighting and textures, as indicated by the red boxes in the "Baseline+Ours" error maps. Fig. A3, Fig. A4, and Fig. A5 offer qualitative comparisons of our method integrated with other frameworks (OmniRe+Ours, ChatSim+Ours, StreetGS+Ours) against the original frameworks (OmniRe, ChatSim, StreetGS). The images typically show a side-by-side comparison of the rendered image and its corresponding depth map. These visualizations demonstrate improvements in rendering quality and depth prediction achieved by incorporating our approach. For example, the depth maps in "OmniRe+Ours" appear more consistent and detailed compared to "OmniRe". Similarly, "ChatSim+Ours" and "StreetGS+Ours" show enhanced visual fidelity and depth accuracy over their respective baselines.

## References

- [1] Holger Caesar, Varun Bankiti, Alex H Lang, Sourabh Vora, Venice Erin Liong, Qiang Xu, Anush Krishnan, Yu Pan, Giancarlo Baldan, and Oscar Beijbom. nuscenes: A multimodal dataset for autonomous driving. In *Proceedings of the IEEE/CVF conference on computer vision and pattern recognition*, pages 11621–11631, 2020.
- [2] Jiawen Chen, Sylvain Paris, and Frédo Durand. Real-time edge-aware image processing with the bilateral grid. *ACM Transactions on Graphics (TOG)*, 26(3):103–es, 2007.

- 278 [3] Pei Sun, Henrik Kretzschmar, Xerxes Dotiwalla, Aurelien Chouard, Vijaysai Patnaik, Paul Tsui, James Guo,  
279 Yin Zhou, Yuning Chai, Benjamin Caine, et al. Scalability in perception for autonomous driving: Waymo  
280 open dataset. In *Proceedings of the IEEE/CVF conference on computer vision and pattern recognition*,  
281 pages 2446–2454, 2020.
- 282 [4] Adam Tonderski, Carl Lindström, Georg Hess, William Ljungbergh, Lennart Svensson, and Christoffer  
283 Petersson. Neurad: Neural rendering for autonomous driving. In *Proceedings of the IEEE/CVF Conference*  
284 *on Computer Vision and Pattern Recognition*, pages 14895–14904, 2024.
- 285 [5] Yuxi Wei, Zi Wang, Yifan Lu, Chenxin Xu, Changxing Liu, Hao Zhao, Siheng Chen, and Yanfeng Wang.  
286 Editable scene simulation for autonomous driving via collaborative llm-agents. In *Proceedings of the*  
287 *IEEE/CVF Conference on Computer Vision and Pattern Recognition*, pages 15077–15087, 2024.
- 288 [6] Benjamin Wilson, William Qi, Tanmay Agarwal, John Lambert, Jagjeet Singh, Siddhesh Khandelwal, Bowen  
289 Pan, Ratnesh Kumar, Andrew Hartnett, Jhony Kaesemodel Pontes, et al. Argoverse 2: Next generation  
290 datasets for self-driving perception and forecasting. *arXiv preprint arXiv:2301.00493*, 2023.
- 291 [7] Pengchuan Xiao, Zhenlei Shao, Steven Hao, Zishuo Zhang, Xiaolin Chai, Judy Jiao, Zesong Li, Jian Wu,  
292 Kai Sun, Kun Jiang, et al. Pandaset: Advanced sensor suite dataset for autonomous driving. In *2021 IEEE*  
293 *international intelligent transportation systems conference (ITSC)*, pages 3095–3101. IEEE, 2021.
